# Supplementary material for: Metabolomics analysis of post-traumatic stress disorder symptoms in World Trade Center responders
Source: PubMed Central journal article supplement (PMC9050707; doi:10.1038/s41398-022-01940-y), 2022-04-28

# Metabolite-Protein Module Relationships

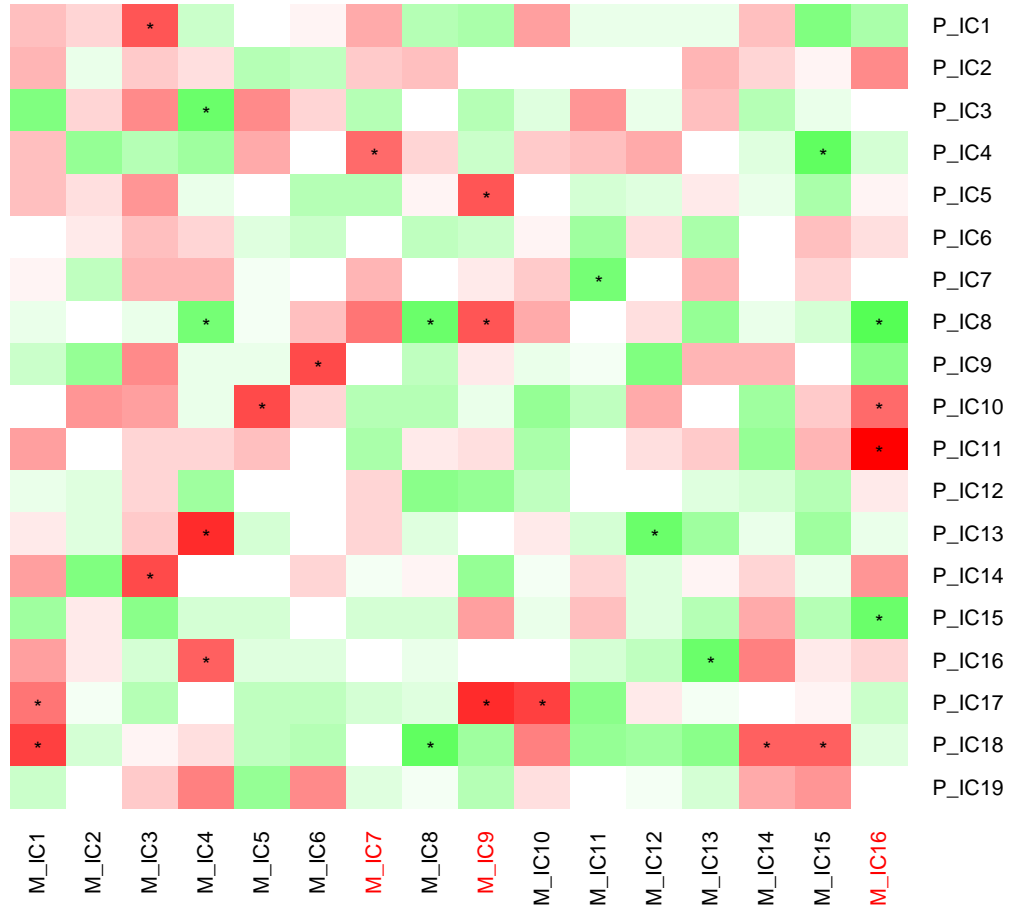

Color Key

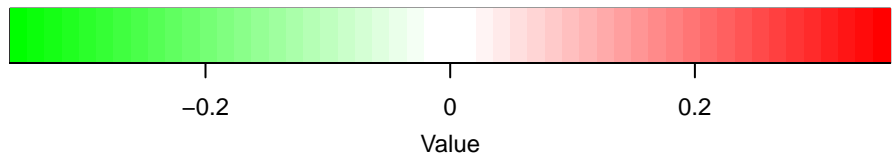

Supplement: 41398_2022_1940_MOESM6_ESM.pdf [file 41398_2022_1940_MOESM6_ESM.pdf]
